# Supplementary material for: Epigenomic profiling of preterm infants reveals DNA methylation differences at sites associated with neural function
Source: PubMed Central journal article supplement (PMC5068883; doi:10.1038/tp.2015.210), 2016-01-19
Supplement: tp2015210x1.pdf [file tp2015210x1.pdf]

Table 1: Differentially expressed genes, as derived by RnBeads

| Ensembl ID      | Chr   | Start     | End       | Symbol         | Entrez ID | Description                                                                       | Gene type               | No. sites | No. sites signif | Mean (0) | Mean (1) | Diff   | p-fdr   | Rank | DM Promoter |
|-----------------|-------|-----------|-----------|----------------|-----------|-----------------------------------------------------------------------------------|-------------------------|-----------|------------------|----------|----------|--------|---------|------|-------------|
| ENSG00000224764 | chr9  | 97690833  | 97697228  | RP11-54O15.3   |           |                                                                                   | antisense               | 1         | 1                | 0.28     | 0.19     | 0.088  | 0.00098 | 12   | No          |
| ENSG00000260466 | chr16 | 87870138  | 87871269  | RP4-536B24.2   |           |                                                                                   | antisense               | 2         | 1                | 0.38     | 0.28     | 0.1    | 0.0019  | 21   | No          |
| ENSG00000136514 | chr3  | 187086120 | 187089864 | RTP4           | 64108     | receptor (chemosensory) protein 4                                                 | coding                  | 4         | 2                | 0.68     | 0.57     | 0.1    | 0.00062 | 31   | Yes         |
| ENSG00000250280 | chr12 | 65675437  | 65680508  | RP11-305O6.3   |           | [Source:HGNC Symbol; Acc:HGNC:23992]                                              | sense                   | 2         | 1                | 0.29     | 0.39     | -0.095 | 0.0045  | 33   | Yes         |
| ENSG00000258935 | chr14 | 91033839  | 91036320  | RP11-107RH9.2  |           |                                                                                   | intronic                | 1         | 1                | 0.35     | 0.44     | -0.084 | 0.0019  | 34   | No          |
| ENSG00000130881 | chr9  | 104122699 | 104145801 | BAAT           | 570       | bile acid CoA:amino acid N-acyltransferase [Source:HGNC Symbol; Acc:HGNC:932]     | protein coding          | 1         | 1                | 0.53     | 0.43     | 0.1    | 0.00098 | 35   | Yes         |
| ENSG00000129048 | chr3  | 132316081 | 132337811 | ACKR4          | 51554     | atypical chemokine receptor 4 [Source:HGNC Symbol; Acc:HGNC:1611]                 | protein coding          | 2         | 1                | 0.45     | 0.53     | -0.079 | 0.0027  | 39   | No          |
| ENSG00000249429 | chr5  | 142869420 | 142910915 | CTD-2050E21.1  |           |                                                                                   | lincRNA                 | 1         | 1                | 0.39     | 0.51     | -0.11  | 0.0073  | 39   | No          |
| ENSG00000252774 | chr15 | 64634738  | 64634897  | SNORA48        |           | Small nucleolar RNA SNORA48 [Source:RFAM; Acc:RF00554]                            | snRNA                   | 1         | 1                | 0.13     | 0.23     | -0.11  | 0.011   | 45   | Yes         |
| ENSG00000261117 | chr2  | 12855541  | 12856353  | RP11-333O1.1   |           |                                                                                   | lincRNA                 | 1         | 1                | 0.37     | 0.3      | 0.065  | 0.0018  | 49   | Yes         |
| ENSG00000132530 | chr17 | 6658766   | 6678966   | XAF1           | 54739     | XIAP associated factor 1 [Source:HGNC Symbol; Acc:HGNC:30932]                     | protein coding          | 11        | 6                | 0.55     | 0.5      | 0.056  | 0.019   | 62   | No          |
| ENSG00000259450 | chr15 | 39480639  | 39486510  | RP11-263N7.1   |           |                                                                                   | lincRNA                 | 1         | 1                | 0.43     | 0.51     | -0.085 | 0.0068  | 64   | No          |
| ENSG00000239482 | chr3  | 112021325 | 112051638 | RP11-90K6.1    |           |                                                                                   | lincRNA                 | 2         | 1                | 0.35     | 0.42     | -0.067 | 2.9e-05 | 75   | No          |
| ENSG00000164241 | chr5  | 126378250 | 126409184 | C5orf63        | 401207    | chromosome 5 open reading frame 63 [Source:HGNC Symbol; Acc:HGNC:40051]           | protein coding          | 10        | 4                | 0.42     | 0.47     | -0.048 | 0.01    | 81   | Yes         |
| ENSG00000261550 | chr16 | 53069602  | 53086785  | RP11-467J12.4  |           |                                                                                   | antisense               | 1         | 1                | 0.21     | 0.29     | -0.075 | 0.044   | 84   | No          |
| ENSG00000229167 | chr1  | 32037186  | 32041174  | RP11-73M7.1    |           |                                                                                   | antisense               | 2         | 1                | 0.57     | 0.48     | 0.087  | 2.9e-05 | 86   | No          |
| ENSG00000250509 | chr5  | 179868559 | 179870238 | CTC-573N18.1   |           |                                                                                   | lincRNA                 | 1         | 1                | 0.34     | 0.26     | 0.076  | 0.046   | 86   | Yes         |
| ENSG00000184795 | chr11 | 67479173  | 67483476  | UNC93B5        |           | unc-93 homolog B5 pseudogene (C. elegans) [Source:HGNC Symbol; Acc:HGNC:34051]    | unprocessed pseudogene  | 3         | 1                | 0.24     | 0.2      | 0.048  | 0.034   | 86   | No          |
| ENSG00000171236 | chr19 | 4536421   | 4540486   | LRG1           | 116844    | leucine-rich alpha-2-glycoprotein 1 [Source:HGNC Symbol; Acc:HGNC:29480]          | protein coding          | 5         | 2                | 0.69     | 0.62     | 0.063  | 0.018   | 90   | Yes         |
| ENSG00000259727 | chr15 | 63188011  | 63191742  | RP11-1069G10.2 |           |                                                                                   | lincRNA                 | 1         | 1                | 0.54     | 0.64     | -0.095 | 0.026   | 95   | No          |
| ENSG00000204193 | chr9  | 113065801 | 113100127 | TXNDC8         | 255220    | thioredoxin domain containing 8 (spermatzoa) [Source:HGNC Symbol; Acc:HGNC:31454] | protein coding          | 2         | 1                | 0.43     | 0.5      | -0.072 | 0.044   | 107  | Yes         |
| ENSG00000258355 | chr12 | 106639391 | 106640734 | RP11-651L5.2   |           |                                                                                   | sense                   | 1         | 1                | 0.39     | 0.33     | 0.053  | 0.03    | 125  | No          |
| ENSG00000109272 | chr4  | 74718906  | 74719872  | PF4V1          | 5197      | platelet factor 4 variant 1 [Source:HGNC Symbol; Acc:HGNC:8862]                   | intronic protein coding | 6         | 5                | 0.32     | 0.36     | -0.047 | 0.013   | 126  | Yes         |
| ENSG00000255038 | chr11 | 65834748  | 65837090  | RP11-1167A19.2 |           |                                                                                   | antisense               | 2         | 1                | 0.42     | 0.48     | -0.062 | 0.0084  | 143  | No          |
| ENSG0000028176  | chr1  | 30181698  | 30182394  | RP4-656G21.1   |           |                                                                                   | lincRNA                 | 1         | 1                | 0.43     | 0.37     | 0.055  | 0.04    | 147  | Yes         |
| ENSG00000235285 | chr13 | 44720606  | 44732358  | SMIM2-IT1      | 100874377 | SMIM2 intronic transcript 1 [Source:HGNC Symbol; Acc:HGNC:41492]                  | sense intronic          | 1         | 1                | 0.55     | 0.63     | -0.079 | 0.0073  | 159  | No          |
| ENSG00000258987 | chr14 | 94405901  | 94410475  | RP11-131H24.4  |           |                                                                                   | antisense               | 5         | 2                | 0.39     | 0.34     | 0.041  | 0.022   | 162  | No          |
| ENSG00000254632 | chr11 | 76470960  | 76479267  | RP11-21L23.4   |           |                                                                                   | antisense               | 1         | 1                | 0.65     | 0.57     | 0.077  | 0.012   | 179  | No          |
| ENSG00000261269 | chr5  | 71735730  | 71738214  | RP11-389C8.2   |           |                                                                                   | sense                   | 1         | 1                | 0.61     | 0.69     | -0.081 | 0.0059  | 182  | Yes         |
| ENSG00000230454 | chr3  | 50297735  | 50300790  | U73166.2       | 3430      | interferon-induced protein 35 [Source:HGNC Symbol; Acc:HGNC:5399]                 | overlapping lincRNA     | 3         | 2                | 0.34     | 0.38     | -0.037 | 0.00069 | 190  | No          |
| ENSG0000068079  | chr17 | 41158742  | 41166473  | IFI35          |           |                                                                                   | protein coding          | 3         | 2                | 0.24     | 0.2      | 0.037  | 0.00062 | 192  | Yes         |
| ENSG00000172232 | chr19 | 825097    | 832017    | AZU1           | 566       | azurocidin 1 [Source:HGNC Symbol; Acc:HGNC:913]                                   | protein coding          | 10        | 4                | 0.51     | 0.47     | 0.036  | 0.021   | 206  | No          |

|                 |       |           |           |                |           |                                                                                                                       |    |    |       |       |        |         |     |     |
|-----------------|-------|-----------|-----------|----------------|-----------|-----------------------------------------------------------------------------------------------------------------------|----|----|-------|-------|--------|---------|-----|-----|
| ENSG00000108448 | chr17 | 18601311  | 18639431  | TRIM16L        | 147166    | tripartite motif containing 16-like [Source:HGNC Symbol; Acc:HGNC:32670]                                              | 4  | 1  | 0.59  | 0.66  | -0.074 | 0.0026  | 216 | No  |
| ENSG00000066697 | chr9  | 103189438 | 103213511 | MSANTD3        | 91283     | Myb/SANT-like DNA-binding domain containing 3 [Source:HGNC Symbol; Acc:HGNC:23370]                                    | 3  | 1  | 0.23  | 0.2   | 0.037  | 0.026   | 241 | No  |
| ENSG00000188394 | chr9  | 125796806 | 125797975 | GPR21          | 2844      | G protein-coupled receptor 21 [Source:HGNC Symbol; Acc:HGNC:4476]                                                     | 3  | 1  | 0.63  | 0.66  | -0.035 | 0.0029  | 274 | Yes |
| ENSG00000232799 | chr2  | 210009965 | 210012411 | CRYGFP         |           | crystallin, gamma F pseudogene [Source:HGNC Symbol; Acc:HGNC:2413]                                                    | 5  | 1  | 0.75  | 0.68  | 0.073  | 0.05    | 294 | No  |
| ENSG00000260604 | chr6  | 3905144   | 3912213   | RP11-140K8.5   |           | SLAM family member 9 [Source:HGNC Symbol; Acc:HGNC:18430]                                                             | 2  | 1  | 0.63  | 0.57  | 0.057  | 0.021   | 298 | Yes |
| ENSG00000162723 | chr1  | 159921282 | 159924044 | SLAMF9         | 89886     |                                                                                                                       | 4  | 2  | 0.54  | 0.59  | -0.053 | 0.0091  | 311 | No  |
| ENSG00000256357 | chr14 | 94896970  | 94931067  | RP11-349J1.2   |           | antisense [Source:HGNC Symbol; Acc:HGNC:8078]                                                                         | 4  | 2  | 0.66  | 0.71  | -0.053 | 0.02    | 313 | Yes |
| ENSG00000269275 | chr19 | 5588947   | 55889493  | CTD-2105E13.15 |           | antisense [Source:HGNC Symbol; Acc:HGNC:8078]                                                                         | 4  | 2  | 0.7   | 0.64  | 0.068  | 0.0041  | 315 | Yes |
| ENSG00000182379 | chr12 | 57610578  | 57620232  | NXPH4          | 11247     | neurexophilin 4 [Source:HGNC Symbol; Acc:HGNC:8078]                                                                   | 19 | 9  | 0.36  | 0.33  | 0.03   | 0.018   | 326 | No  |
| ENSG00000225208 | chr10 | 103070775 | 103071262 | RP11-107H14.2  |           | long intergenic non-protein coding RNA 708 [Source:HGNC Symbol; Acc:HGNC:44694]                                       | 1  | 1  | 0.53  | 0.59  | -0.054 | 0.0028  | 334 | Yes |
| ENSG00000232170 | chr10 | 8301294   | 8310268   | LINC00708      | 100507143 | solute carrier family 7 (amino acid transporter light chain, L system), member 5 [Source:HGNC Symbol; Acc:HGNC:11063] | 3  | 2  | 0.56  | 0.61  | -0.056 | 0.044   | 346 | No  |
| ENSG00000103257 | chr16 | 87863629  | 87903094  | SLC7A5         | 8140      | RNA, U5f small nuclear 2, pseudogene [Source:HGNC Symbol; Acc:HGNC:42510]                                             | 50 | 25 | 0.61  | 0.56  | 0.05   | 0.0019  | 359 | Yes |
| ENSG00000248884 | chr5  | 67726254  | 67730308  | CTC-537E7.3    |           | cyclin-dependent kinase inhibitor 2B (p15, inhibits CDK4) [Source:HGNC Symbol; Acc:HGNC:1788]                         | 2  | 1  | 0.062 | 0.033 | 0.028  | 0.00043 | 378 | Yes |
| ENSG00000251875 | chr1  | 179545403 | 179545484 | RNU5F-2P       |           | antisense [Source:HGNC Symbol; Acc:HGNC:26259]                                                                        | 2  | 1  | 0.48  | 0.44  | 0.043  | 0.038   | 386 | No  |
| ENSG00000147883 | chr9  | 22002902  | 22009362  | CDKN2B         | 1030      | zinc finger CCH-type containing 12A [Source:HGNC Symbol; Acc:HGNC:32584]                                              | 4  | 2  | 0.16  | 0.13  | 0.028  | 0.023   | 389 | No  |
| ENSG00000229257 | chr9  | 139952115 | 139956913 | RP11-229P13.22 |           | antisense [Source:HGNC Symbol; Acc:HGNC:26259]                                                                        | 1  | 1  | 0.77  | 0.71  | 0.064  | 0.019   | 442 | Yes |
| ENSG00000258376 | chr14 | 73710726  | 73712687  | RP4-647C14.2   |           | antisense [Source:HGNC Symbol; Acc:HGNC:26259]                                                                        | 4  | 3  | 0.63  | 0.58  | 0.05   | 0.00098 | 450 | Yes |
| ENSG00000163874 | chr1  | 37940153  | 37949980  | ZC3H12A        | 80149     | small nucleolar RNA, H/ACA box 2A [Source:HGNC Symbol; Acc:HGNC:32584]                                                | 12 | 5  | 0.36  | 0.33  | 0.032  | 0.026   | 457 | No  |
| ENSG00000206612 | chr12 | 49050431  | 49050565  | SNORA2A        | 677793    | transmembrane protein 190 [Source:HGNC Symbol; Acc:HGNC:29632]                                                        | 1  | 1  | 0.75  | 0.82  | -0.065 | 0.00098 | 475 | Yes |
| ENSG00000238279 | chr1  | 153506079 | 153507591 | BX470102.3     |           | antisense [Source:HGNC Symbol; Acc:HGNC:48336]                                                                        | 1  | 1  | 0.61  | 0.66  | -0.051 | 0.0051  | 517 | No  |
| ENSG00000160472 | chr19 | 55888204  | 55889612  | TMEM190        | 147744    | small nucleolar RNA, H/ACA box 71D [Source:HGNC Symbol; Acc:HGNC:32657]                                               | 5  | 2  | 0.74  | 0.69  | 0.054  | 0.023   | 554 | Yes |
| ENSG00000258847 | chr14 | 66424015  | 66471241  | CTD-2014B16.3  |           | lincRNA [Source:HGNC Symbol; Acc:HGNC:32657]                                                                          | 3  | 1  | 0.68  | 0.73  | -0.054 | 0.00069 | 565 | No  |
| ENSG00000200354 | chr20 | 37062508  | 37062641  | SNORA71D       | 677840    | lincRNA [Source:HGNC Symbol; Acc:HGNC:32657]                                                                          | 1  | 1  | 0.78  | 0.72  | 0.058  | 0.0074  | 573 | No  |
| ENSG00000266998 | chr17 | 75369900  | 75373318  | RP11-936I5.1   |           | antisense [Source:HGNC Symbol; Acc:HGNC:48336]                                                                        | 9  | 4  | 0.59  | 0.62  | -0.023 | 0.022   | 603 | No  |
| ENSG00000255093 | chr11 | 111328876 | 111328876 | RP11-794P6.2   |           | antisense [Source:HGNC Symbol; Acc:HGNC:6449]                                                                         | 1  | 1  | 0.62  | 0.58  | 0.041  | 0.0019  | 726 | No  |
| ENSG00000267092 | chr19 | 1508381   | 1508962   | CTB-25B13.9    |           | antisense [Source:HGNC Symbol; Acc:HGNC:6449]                                                                         | 2  | 1  | 0.13  | 0.11  | 0.021  | 0.03    | 741 | No  |
| ENSG00000249184 | chr4  | 152720652 | 152722500 | RP11-424M21.1  |           | lincRNA [Source:HGNC Symbol; Acc:HGNC:6449]                                                                           | 1  | 1  | 0.79  | 0.84  | -0.054 | 0.026   | 764 | Yes |
| ENSG00000232991 | chr2  | 108370568 | 108438585 | GACAT1         |           | gastric cancer associated transcript 1 (non-protein coding) [Source:HGNC Symbol; Acc:HGNC:48336]                      | 1  | 1  | 0.72  | 0.77  | -0.048 | 0.0021  | 805 | No  |
| ENSG00000108759 | chr17 | 39616063  | 39623681  | KRT32          | 3882      | keratin 32, type I [Source:HGNC Symbol; Acc:HGNC:6449]                                                                | 3  | 1  | 0.77  | 0.82  | -0.048 | 0.0016  | 903 | Yes |
| ENSG00000259177 | chr15 | 90936722  | 90941113  | RP11-154B12.3  |           | antisense [Source:HGNC Symbol; Acc:HGNC:6449]                                                                         | 1  | 1  | 0.75  | 0.8   | -0.046 | 0.0027  | 931 | No  |
| ENSG00000259287 | chr15 | 34150918  | 34157026  | RP11-3D4.2     |           | antisense [Source:HGNC Symbol; Acc:HGNC:6449]                                                                         | 1  | 1  | 0.74  | 0.78  | -0.044 | 0.023   | 972 | No  |

|                 |       |           |           |               |           |                                                                                                          |   |   |       |       |        |         |       |     |
|-----------------|-------|-----------|-----------|---------------|-----------|----------------------------------------------------------------------------------------------------------|---|---|-------|-------|--------|---------|-------|-----|
| ENSG00000234771 | chr9  | 130873450 | 130881013 | SLC25A25-AS1  | 100289019 | SLC25A25 antisense RNA<br>1 [Source:HGNC Symbol;<br>Acc:HGNC:27844]                                      | 2 | 1 | 0.41  | 0.44  | -0.023 | 0.04    | 1172  | No  |
| ENSG00000151631 | chr10 | 4914093   | 4934167   | AKR1C6P       | 389932    | aldo-keto reductase family<br>1, member C6, pseudogene<br>[Source:HGNC Symbol;<br>Acc:HGNC:44680]        | 1 | 1 | 0.92  | 0.87  | 0.047  | 0.00065 | 1206  | No  |
| ENSG00000253792 | chr5  | 157600609 | 157603430 | CTC-436K13.5  | 360155    | cytochrome c, somatic<br>pseudogene 52 [Source:HGNC<br>Symbol; Acc:HGNC:24393]                           | 1 | 1 | 0.91  | 0.87  | 0.046  | 0.00029 | 1232  | Yes |
| ENSG00000253673 | chr5  | 157602404 | 157627024 | CTC-436K13.1  |           |                                                                                                          | 1 | 1 | 0.91  | 0.87  | 0.046  | 0.00029 | 1232  | Yes |
| ENSG00000235700 | chr1  | 157098154 | 157098463 | CYCSP52       |           |                                                                                                          | 1 | 1 | 0.82  | 0.86  | -0.043 | 0.00011 | 1257  | Yes |
| ENSG00000260362 | chr16 | 9760742   | 9770700   | RP11-297M9.1  |           |                                                                                                          | 1 | 1 | 0.85  | 0.81  | 0.042  | 0.048   | 1310  | No  |
| ENSG00000267239 | chr18 | 13203773  | 13216366  | RP11-794M8.1  |           |                                                                                                          | 1 | 1 | 0.84  | 0.8   | 0.041  | 0.016   | 1342  | No  |
| ENSG00000207625 | chr3  | 35785968  | 35786051  | MIR128-2      | 406916    | microRNA 128-2 [Source:HGNC<br>Symbol; Acc:HGNC:31511]                                                   | 1 | 1 | 0.87  | 0.83  | 0.039  | 0.05    | 1527  | No  |
| ENSG00000262097 | chr16 | 14103137  | 14109873  | CTD-2135D7.5  |           |                                                                                                          | 1 | 1 | 0.9   | 0.86  | 0.038  | 0.012   | 1652  | No  |
| ENSG00000179447 | chr20 | 19222946  | 19265240  | RP5-1027G4.3  | 100130264 |                                                                                                          | 1 | 1 | 0.83  | 0.86  | -0.037 | 0.006   | 1680  | No  |
| ENSG00000236171 | chr10 | 118955679 | 118956165 | RP11-501J20.3 |           |                                                                                                          | 2 | 2 | 0.87  | 0.83  | 0.036  | 0.026   | 1763  | No  |
| ENSG00000231394 | chr7  | 55661470  | 55662699  | RP11-310H4.3  | 390940    | phospholipase A2 inhibitor<br>and LY6/PLAUR domain<br>containing [Source:HGNC<br>Symbol; Acc:HGNC:44206] | 1 | 1 | 0.77  | 0.74  | 0.031  | 0.011   | 1945  | Yes |
| ENSG00000234465 | chr19 | 44080952  | 44088116  | PINLYP        |           |                                                                                                          | 1 | 1 | 0.75  | 0.78  | -0.029 | 0.041   | 2127  | No  |
| ENSG00000253509 | chr8  | 41132634  | 41134522  | CTD-3080F16.3 |           |                                                                                                          | 1 | 1 | 0.76  | 0.79  | -0.03  | 0.0018  | 2160  | No  |
| ENSG00000249942 | chr4  | 75418301  | 75514664  | AC142293.3    |           |                                                                                                          | 3 | 1 | 0.046 | 0.057 | -0.011 | 0.041   | 2197  | Yes |
| ENSG00000208036 | chr7  | 99691616  | 99691697  | MIR106B       | 406900    | microRNA 106b [Source:HGNC<br>Symbol; Acc:HGNC:31495]                                                    | 2 | 1 | 0.78  | 0.81  | -0.028 | 0.029   | 2462  | No  |
| ENSG00000228680 | chr7  | 43278665  | 43288867  | AC004692.4    |           |                                                                                                          | 6 | 4 | 0.71  | 0.69  | 0.018  | 0.021   | 2651  | Yes |
| ENSG00000178395 | chr1  | 223566715 | 223568812 | C1orf65       | 164127    | coiled-coil domain containing<br>185 [Source:HGNC Symbol;<br>Acc:HGNC:26654]                             | 7 | 2 | 0.62  | 0.6   | 0.022  | 0.05    | 2871  | No  |
| ENSG00000251387 | chr5  | 139152113 | 139154991 | CTB-35F21.3   |           |                                                                                                          | 1 | 1 | 0.055 | 0.047 | 0.0082 | 0.0015  | 3564  | Yes |
| ENSG00000198976 | chr1  | 1104385   | 1104467   | MIR429        | 554210    | microRNA 429 [Source:HGNC<br>Symbol; Acc:HGNC:13784]                                                     | 2 | 2 | 0.84  | 0.87  | -0.022 | 0.0042  | 4123  | No  |
| ENSG00000258412 | chr14 | 96677197  | 96681155  | RP11-404P21.5 |           |                                                                                                          | 1 | 1 | 0.82  | 0.84  | -0.018 | 0.038   | 5763  | No  |
| ENSG00000247993 | chr5  | 72742184  | 72742811  | FOXD1-AS1     |           | FOXD1 antisense RNA<br>1 [Source:HGNC Symbol;<br>Acc:HGNC:50658]                                         | 1 | 1 | 0.024 | 0.019 | 0.0053 | 0.021   | 6309  | No  |
| ENSG00000185069 | chr12 | 53161939  | 53171129  | KRT76         | 51350     | keratin 76, type II<br>[Source:HGNC Symbol;<br>Acc:HGNC:24430]                                           | 4 | 1 | 0.95  | 0.96  | -0.013 | 0.026   | 10235 | No  |
| ENSG00000203942 | chr10 | 99349450  | 99350690  | C10orf62      | 414157    | chromosome 10 open reading<br>frame 62 [Source:HGNC Symbol;<br>Acc:HGNC:23294]                           | 1 | 1 | 0.95  | 0.96  | -0.011 | 0.0027  | 11576 | No  |
