# Supplementary material for: Epigenomic profiling of preterm infants reveals DNA methylation differences at sites associated with neural function
Source: PubMed Central journal article supplement (PMC5068883; doi:10.1038/tp.2015.210), 2016-01-19
Supplement: tp2015210x2.pdf [file tp2015210x2.pdf]

Table 2: Differentially expressed promoters, as derived by RnBeads

| Ensembl ID      | Chr   | Start     | End       | Symbol        | Entrez ID           | Description                                                                                                            | Gene type            | No. sites | No. sites signif | Mean (0) | Mean (1) | Diff   | p.fdr   | Rank | DM CGI |
|-----------------|-------|-----------|-----------|---------------|---------------------|------------------------------------------------------------------------------------------------------------------------|----------------------|-----------|------------------|----------|----------|--------|---------|------|--------|
| ENSG00000232415 | chr7  | 73476115  | 73478114  | CTB-51J22.1   |                     |                                                                                                                        | antisense            | 1         | 1                | 0.19     | 0.27     | -0.084 | 0.00034 | 16   | No     |
| ENSG00000267385 | chr19 | 4539580   | 4541579   | CTB-50L17.14  |                     | Uncharacterized protein                                                                                                | protein coding       | 5         | 2                | 0.58     | 0.48     | 0.096  | 0.00076 | 30   | No     |
|                 |       |           |           |               |                     | {ECO:0000313 Ensembl:ENSP00000464793}                                                                                  |                      |           |                  |          |          |        |         |      |        |
|                 |       |           |           |               |                     | [Source:UniProtKB/TrEMBL; Acc:K7EIL1]                                                                                  |                      |           |                  |          |          |        |         |      |        |
| ENSG00000171236 | chr19 | 4539987   | 4541986   | LRG1          | 116844              | leucine-rich alpha-2-glycoprotein 1 [Source:HGNC Symbol; Acc:HGNC:29480]                                               | protein coding       | 4         | 2                | 0.58     | 0.48     | 0.096  | 0.00076 | 30   | No     |
| ENSG00000250020 | chr5  | 56813     | 58812     | RP11-811I15.1 |                     |                                                                                                                        | processed pseudogene | 1         | 1                | 0.61     | 0.48     | 0.13   | 6.5e-07 | 35   | No     |
| ENSG00000250280 | chr12 | 65673937  | 65675936  | RP11-305O6.3  |                     |                                                                                                                        | sense intronic       | 1         | 1                | 0.29     | 0.39     | -0.095 | 0.0037  | 40   | No     |
| ENSG00000164241 | chr5  | 126408685 | 126410684 | C5orf63       | 401207<br>101060408 | chromosome 5 open reading frame 63 [Source:HGNC Symbol; Acc:HGNC:40051]                                                | protein coding       | 14        | 11               | 0.3      | 0.36     | -0.063 | 0.0013  | 55   | Yes    |
| ENSG00000252774 | chr15 | 64633238  | 64635237  | SNORA48       |                     | Small nucleolar RNA SNORA48 [Source:RFAM; Acc:RF00554]                                                                 | snoRNA               | 1         | 1                | 0.13     | 0.23     | -0.11  | 0.0086  | 55   | No     |
| ENSG00000136514 | chr3  | 187084620 | 187086619 | RTP4          | 64108               | receptor (chemosensory) transporter protein 4 [Source:HGNC Symbol; Acc:HGNC:23992]                                     | protein coding       | 5         | 2                | 0.68     | 0.57     | 0.1    | 0.00034 | 59   | No     |
| ENSG00000253837 | chr8  | 23192184  | 23194183  | RP11-177H13.2 | 100507156           |                                                                                                                        | processed transcript | 1         | 1                | 0.16     | 0.1      | 0.061  | 0.00023 | 60   | No     |
| ENSG00000135406 | chr12 | 49685535  | 49687534  | PRPH          | 5630                | peripherin [Source:HGNC Symbol; Acc:HGNC:9461]                                                                         | protein coding       | 1         | 1                | 0.21     | 0.27     | -0.061 | 0.00034 | 63   | No     |
| ENSG00000234502 | chr9  | 104138386 | 104140385 | FYTTD1P1      |                     | forty-two-three domain containing 1 pseudogene 1 [Source:HGNC Symbol; Acc:HGNC:38035]                                  | processed pseudogene | 1         | 1                | 0.53     | 0.43     | 0.1    | 0.00067 | 64   | No     |
| ENSG00000186910 | chr14 | 94918628  | 94920627  | SERPINA11     | 256394              | serpin peptidase inhibitor, clade A (alpha-1 antitrypsin, antitrypsin), member 11 [Source:HGNC Symbol; Acc:HGNC:19193] | protein coding       | 1         | 1                | 0.44     | 0.53     | -0.098 | 0.0019  | 66   | No     |
| ENSG00000167173 | chr15 | 75486484  | 75488483  | C15orf39      | 56905               | chromosome 15 open reading frame 39 [Source:HGNC Symbol; Acc:HGNC:24497]                                               | protein coding       | 1         | 1                | 0.28     | 0.34     | -0.062 | 0.0057  | 71   | No     |
| ENSG00000261117 | chr2  | 12854041  | 12856040  | RP11-333O1.1  |                     |                                                                                                                        | lincRNA              | 1         | 1                | 0.37     | 0.3      | 0.065  | 0.0012  | 76   | No     |
| ENSG00000108759 | chr17 | 39623182  | 39625181  | KRT32         | 3882                | keratin 32 [Source:HGNC Symbol; Acc:HGNC:6449]                                                                         | protein coding       | 5         | 3                | 0.56     | 0.49     | 0.065  | 0.00067 | 81   | No     |
| ENSG00000223125 | chr17 | 39622708  | 39624707  | RNU2-32P      |                     | RNA, U2 small nuclear 32, pseudogene [Source:HGNC Symbol; Acc:HGNC:48525]                                              | snRNA                | 5         | 3                | 0.56     | 0.49     | 0.065  | 0.00067 | 81   | No     |
| ENSG00000252642 | chr3  | 124776783 | 124778782 | RNA5SP137     |                     | RNA, 5S ribosomal pseudogene 137 [Source:HGNC Symbol; Acc:HGNC:43037]                                                  | rRNA                 | 1         | 1                | 0.53     | 0.64     | -0.11  | 0.00076 | 85   | No     |
| ENSG00000160868 | chr7  | 99381389  | 99383388  | CYP3A4        | 1576                | cytochrome P450, family 3, subfamily A, polypeptide 4 [Source:HGNC Symbol; Acc:HGNC:2637]                              | protein coding       | 4         | 2                | 0.44     | 0.49     | -0.054 | 0.014   | 87   | No     |
| ENSG00000204020 | chr10 | 90519663  | 90521662  | LIPN          | 643418              | lipase, family member N [Source:HGNC Symbol; Acc:HGNC:23452]                                                           | protein coding       | 1         | 1                | 0.2      | 0.14     | 0.059  | 0.018   | 87   | No     |
| ENSG00000218416 | chr2  | 241395632 | 241397631 | PP14571       |                     | uncharacterized LOC100130449 [Source:EntrezGene; Acc:100130449]                                                        | processed transcript | 5         | 3                | 0.13     | 0.19     | -0.053 | 0.00076 | 97   | No     |
| ENSG00000078098 | chr2  | 163101162 | 163103161 | FAP           | 2191                | fibroblast activation protein, alpha [Source:HGNC Symbol; Acc:HGNC:3590]                                               | protein coding       | 1         | 1                | 0.49     | 0.41     | 0.081  | 0.018   | 98   | No     |
| ENSG00000122641 | chr7  | 41742207  | 41744206  | INHBA         | 3624                | inhibin, beta A [Source:HGNC Symbol; Acc:HGNC:6066]                                                                    | protein coding       | 5         | 3                | 0.54     | 0.63     | -0.085 | 0.00055 | 99   | No     |

|                 |       |           |           |               |           |                                                                                                                  |                      |   |   |       |      |        |         |     |     |
|-----------------|-------|-----------|-----------|---------------|-----------|------------------------------------------------------------------------------------------------------------------|----------------------|---|---|-------|------|--------|---------|-----|-----|
| ENSG00000135063 | chr9  | 71937988  | 71939987  | FAM189A2      | 9413      | family with sequence similarity 189, member A2 [Source:HGNC Symbol; Acc:HGNC:24820]                              | protein coding       | 2 | 2 | 0.37  | 0.42 | -0.051 | 0.00067 | 111 | No  |
| ENSG00000250509 | chr5  | 179867059 | 179869058 | CTC-573N18.1  |           |                                                                                                                  | lincRNA              | 1 | 1 | 0.34  | 0.26 | 0.076  | 0.034   | 115 | No  |
| ENSG00000267457 | chr17 | 33400894  | 33402893  | RP5-837J1.4   |           |                                                                                                                  | lincRNA              | 1 | 1 | 0.094 | 0.14 | -0.05  | 0.0012  | 115 | No  |
| ENSG00000207817 | chr12 | 13067263  | 13069262  | MIR614        | 693199    | microRNA 614 [Source:HGNC Symbol; Acc:HGNC:32870]                                                                | miRNA                | 4 | 2 | 0.14  | 0.21 | -0.071 | 0.034   | 116 | No  |
| ENSG00000260604 | chr6  | 3911714   | 3913713   | RP1-140K8.5   |           |                                                                                                                  | lincRNA              | 1 | 1 | 0.57  | 0.48 | 0.087  | 0.00034 | 122 | No  |
| ENSG00000169903 | chr3  | 149190261 | 149192260 | TM4SF4        | 7104      | transmembrane 4 L six family member 4 [Source:HGNC Symbol; Acc:HGNC:11856]                                       | protein coding       | 3 | 1 | 0.26  | 0.32 | -0.057 | 0.05    | 143 | No  |
| ENSG00000169245 | chr4  | 76944151  | 76946150  | CXCL10        | 3627      | chemokine (C-X-C motif) ligand 10 [Source:HGNC Symbol; Acc:HGNC:10637]                                           | protein coding       | 4 | 1 | 0.61  | 0.52 | 0.088  | 0.05    | 145 | No  |
| ENSG00000204193 | chr9  | 113099628 | 113101627 | TXNDC8        | 255220    | thioredoxin domain containing 8 (spermatzoa) [Source:HGNC Symbol; Acc:HGNC:31454]                                | protein coding       | 1 | 1 | 0.43  | 0.5  | -0.072 | 0.033   | 147 | No  |
| ENSG00000145649 | chr5  | 54396976  | 54398975  | GZMA          | 3001      | granzyme A (granzyme 1, cytotoxic T-lymphocyte-associated serine esterase 3) [Source:HGNC Symbol; Acc:HGNC:4708] | protein coding       | 4 | 1 | 0.11  | 0.16 | -0.045 | 0.034   | 152 | No  |
| ENSG00000200135 | chr12 | 112585664 | 112587663 | Y RNA         |           | Y RNA [Source:RFAM; Acc:RF00019]                                                                                 | misc RNA             | 1 | 1 | 0.32  | 0.37 | -0.052 | 0.0036  | 160 | No  |
| ENSG00000069122 | chr6  | 46922181  | 46924180  | GPR116        | 221395    | G protein-coupled receptor 116 [Source:HGNC Symbol; Acc:HGNC:19030]                                              | protein coding       | 4 | 2 | 0.31  | 0.37 | -0.062 | 0.0026  | 162 | No  |
| ENSG00000222112 | chr1  | 33801966  | 33803965  | RN7SKP16      |           | RNA, 7SK small nuclear pseudogene 16 [Source:HGNC Symbol; Acc:HGNC:45740]                                        | misc RNA             | 1 | 1 | 0.41  | 0.48 | -0.065 | 0.00055 | 163 | No  |
| ENSG00000183729 | chr8  | 53849491  | 53851490  | NPBWR1        | 2831      | neuropeptides B/W receptor 1 [Source:HGNC Symbol; Acc:HGNC:4522]                                                 | protein coding       | 1 | 1 | 0.67  | 0.58 | 0.091  | 0.0084  | 166 | No  |
| ENSG00000184330 | chr1  | 153387500 | 153389499 | S100A7A       | 338324    | S100 calcium binding protein A7A [Source:HGNC Symbol; Acc:HGNC:21657]                                            | protein coding       | 4 | 2 | 0.6   | 0.53 | 0.072  | 0.0051  | 169 | No  |
| ENSG00000109272 | chr4  | 74717406  | 74719405  | PF4V1         | 5197      | platelet factor 4 variant 1 [Source:HGNC Symbol; Acc:HGNC:8862]                                                  | protein coding       | 6 | 5 | 0.32  | 0.36 | -0.047 | 0.011   | 170 | Yes |
| ENSG00000179409 | chr17 | 656740    | 658739    | GEMIN4        | 50628     | gem (nuclear organelle) associated protein 4 [Source:HGNC Symbol; Acc:HGNC:15717]                                | protein coding       | 1 | 1 | 0.49  | 0.57 | -0.076 | 0.00076 | 171 | No  |
| ENSG00000228176 | chr1  | 30181895  | 30183894  | RP4-656G21.1  |           |                                                                                                                  | lincRNA              | 1 | 1 | 0.43  | 0.37 | 0.055  | 0.031   | 191 | No  |
| ENSG00000162231 | chr11 | 62573275  | 62575274  | NXF1          | 10482     | nuclear RNA export factor 1 [Source:HGNC Symbol; Acc:HGNC:8071]                                                  | protein coding       | 3 | 2 | 0.33  | 0.29 | 0.04   | 0.012   | 201 | No  |
| ENSG00000166949 | chr15 | 67354601  | 67356600  | SMAD3         | 4088      | SMAD family member 3 [Source:HGNC Symbol; Acc:HGNC:6769]                                                         | protein coding       | 3 | 1 | 0.38  | 0.43 | -0.057 | 0.0094  | 208 | No  |
| ENSG00000188394 | chr9  | 125795306 | 125797305 | GPR21         | 2844      | G protein-coupled receptor 21 [Source:HGNC Symbol; Acc:HGNC:4476]                                                | protein coding       | 4 | 2 | 0.5   | 0.54 | -0.04  | 0.0049  | 212 | No  |
| ENSG00000213090 | chr2  | 202277532 | 202279531 | AC007256.5    |           |                                                                                                                  | processed pseudogene | 1 | 1 | 0.5   | 0.57 | -0.07  | 0.017   | 218 | No  |
| ENSG00000253302 | chr8  | 74330739  | 74332738  | STAU2-AS1     | 100128126 | STAU2 antisense RNA 1 [Source:HGNC Symbol; Acc:HGNC:44101]                                                       | antisense            | 4 | 3 | 0.64  | 0.58 | 0.057  | 0.031   | 219 | No  |
| ENSG00000258297 | chr11 | 66432007  | 66434006  | RP11-658F2.8  |           |                                                                                                                  | antisense            | 1 | 1 | 0.35  | 0.4  | -0.049 | 0.049   | 220 | No  |
| ENSG00000228789 | chr6  | 31019727  | 31021726  | HCG22         | 285834    | HLA complex group 22 [Source:HGNC Symbol; Acc:HGNC:27780]                                                        | lincRNA              | 4 | 2 | 0.67  | 0.74 | -0.067 | 0.049   | 231 | No  |
| ENSG00000270708 | chr1  | 220392133 | 220394132 | RP11-568G11.5 |           |                                                                                                                  | processed pseudogene | 1 | 1 | 0.53  | 0.6  | -0.071 | 0.017   | 241 | No  |
| ENSG00000261269 | chr5  | 71737715  | 71739714  | RP11-389C8.2  |           |                                                                                                                  | sense overlapping    | 2 | 1 | 0.61  | 0.69 | -0.081 | 0.0049  | 245 | No  |
| ENSG00000105737 | chr19 | 42573151  | 42575150  | GRIK5         | 2901      | glutamate receptor, ionotropic, kainate 5 [Source:HGNC Symbol; Acc:HGNC:4583]                                    | protein coding       | 2 | 1 | 0.18  | 0.22 | -0.038 | 0.0096  | 245 | No  |

|                 |       |           |           |                  |        |                                                                                      |                      |    |    |       |       |        |         |     |     |
|-----------------|-------|-----------|-----------|------------------|--------|--------------------------------------------------------------------------------------|----------------------|----|----|-------|-------|--------|---------|-----|-----|
| ENSG00000116251 | chr1  | 6268950   | 6270949   | RPL22            | 6146   | ribosomal protein L22 [Source:HGNC Symbol; Acc:HGNC:10315]                           | protein coding       | 4  | 4  | 0.36  | 0.32  | 0.04   | 0.0029  | 277 | Yes |
| ENSG00000205832 | chr16 | 4604991   | 4606990   | C16orf96         | 342346 | chromosome 16 open reading frame 96 [Source:HGNC Symbol; Acc:HGNC:40031]             | protein coding       | 3  | 1  | 0.73  | 0.65  | 0.082  | 0.016   | 283 | No  |
| ENSG00000254087 | chr8  | 56790872  | 56792871  | LYN              | 4067   | LYN proto-oncogene, Src family tyrosine kinase [Source:HGNC Symbol; Acc:HGNC:6735]   | protein coding       | 12 | 5  | 0.24  | 0.2   | 0.036  | 0.016   | 290 | No  |
| ENSG00000231177 | chr3  | 10324603  | 10326602  | LINC00852        | 84657  | long intergenic non-protein coding RNA 852 [Source:HGNC Symbol; Acc:HGNC:29904]      | antisense            | 5  | 2  | 0.7   | 0.76  | -0.056 | 0.0048  | 296 | No  |
| ENSG00000259195 | chr15 | 86312721  | 86314720  | RP11-158M2.6     |        |                                                                                      | processed pseudogene | 9  | 6  | 0.54  | 0.5   | 0.047  | 0.049   | 302 | No  |
| ENSG00000266233 | chr3  | 98342389  | 98344388  | AC021660.1       |        |                                                                                      | miRNA                | 2  | 1  | 0.45  | 0.5   | -0.055 | 0.029   | 309 | No  |
| ENSG00000267319 | chr19 | 38183966  | 38185965  | CTD-2528L19.3    |        |                                                                                      | processed pseudogene | 2  | 1  | 0.65  | 0.7   | -0.046 | 0.018   | 319 | No  |
| ENSG00000103485 | chr16 | 29688829  | 29690828  | QPRT             | 23475  | quinolinate phosphoribosyltransferase [Source:HGNC Symbol; Acc:HGNC:9755]            | protein coding       | 3  | 1  | 0.14  | 0.18  | -0.033 | 0.00067 | 331 | No  |
| ENSG00000248896 | chr8  | 10585324  | 10587323  | CTD-2135J3.3     |        |                                                                                      | antisense            | 10 | 6  | 0.3   | 0.27  | 0.033  | 0.03    | 332 | No  |
| ENSG00000207611 | chr2  | 241393918 | 241395917 | MIR149           | 406941 | microRNA 149 [Source:HGNC Symbol; Acc:HGNC:31536]                                    | miRNA                | 9  | 5  | 0.26  | 0.29  | -0.032 | 0.014   | 348 | No  |
| ENSG00000222999 | chr18 | 20715977  | 20717976  | AC105247.1       |        |                                                                                      | miRNA                | 6  | 3  | 0.21  | 0.18  | 0.032  | 0.049   | 358 | No  |
| ENSG00000237115 | chr6  | 132149054 | 132151053 | RP1-131F15.2     |        |                                                                                      | processed pseudogene | 1  | 1  | 0.88  | 0.8   | 0.089  | 9.7e-10 | 375 | No  |
| ENSG00000259321 | chr14 | 24607154  | 24609153  | RP11-468E2.5     |        |                                                                                      | lincRNA              | 1  | 1  | 0.5   | 0.56  | -0.055 | 0.021   | 408 | No  |
| ENSG00000254789 | chr11 | 15643438  | 15645437  | RP11-531H8.2     |        |                                                                                      | lincRNA              | 1  | 1  | 0.71  | 0.79  | -0.076 | 0.00034 | 421 | No  |
| ENSG00000253522 | chr5  | 159893775 | 159895774 | MIR146A          | 406938 | microRNA 146a [Source:HGNC Symbol; Acc:HGNC:31533]                                   | lincRNA              | 4  | 2  | 0.59  | 0.54  | 0.052  | 0.018   | 434 | No  |
| ENSG00000213128 | chr17 | 78514503  | 78516502  | RPL32P31         |        | ribosomal protein L32 pseudogene 31 [Source:HGNC Symbol; Acc:HGNC:37035]             | processed pseudogene | 1  | 1  | 0.7   | 0.63  | 0.067  | 0.014   | 437 | No  |
| ENSG00000270937 | chr6  | 1026961   | 1028960   | RP5-856G1.1      |        |                                                                                      | lincRNA              | 1  | 1  | 0.82  | 0.75  | 0.078  | 5.3e-06 | 445 | No  |
| ENSG00000261293 | chr16 | 12188665  | 12190664  | RP11-276H1.2     |        |                                                                                      | antisense            | 1  | 1  | 0.6   | 0.67  | -0.062 | 0.014   | 471 | No  |
| ENSG00000248884 | chr5  | 67729809  | 67731808  | CTC-537E7.3      |        |                                                                                      | lincRNA              | 2  | 1  | 0.062 | 0.033 | 0.028  | 0.00031 | 484 | No  |
| ENSG00000260498 | chr16 | 87812481  | 87814480  | RP4-536B24.4     |        |                                                                                      | lincRNA              | 5  | 3  | 0.3   | 0.27  | 0.027  | 0.049   | 539 | No  |
| ENSG00000258378 | chr14 | 73712188  | 73714187  | RP4-647C14.2     |        |                                                                                      | antisense            | 6  | 5  | 0.6   | 0.55  | 0.049  | 0.00076 | 551 | Yes |
| ENSG00000164122 | chr4  | 177198223 | 177200222 | ASB5             | 140458 | ankyrin repeat and SOCS box containing 5 [Source:HGNC Symbol; Acc:HGNC:17180]        | protein coding       | 1  | 1  | 0.68  | 0.75  | -0.065 | 0.038   | 552 | No  |
| ENSG00000147896 | chr9  | 27522812  | 27524811  | IFNK             | 56832  | interferon, kappa [Source:HGNC Symbol; Acc:HGNC:21714]                               | protein coding       | 1  | 1  | 0.71  | 0.77  | -0.067 | 0.018   | 569 | No  |
| ENSG00000267069 | chr18 | 12286807  | 12288806  | RP11-64C12.8     |        |                                                                                      | lincRNA              | 5  | 4  | 0.15  | 0.12  | 0.026  | 0.027   | 584 | Yes |
| ENSG00000188511 | chr22 | 50050691  | 50052690  | C22orf34         |        | chromosome 22 open reading frame 34 [Source:HGNC Symbol; Acc:HGNC:28010]             | lincRNA              | 5  | 2  | 0.51  | 0.56  | -0.045 | 0.018   | 596 | No  |
| ENSG00000225903 | chr1  | 40097588  | 40099587  | RP1-144F13.3     |        |                                                                                      | antisense            | 2  | 2  | 0.13  | 0.11  | 0.026  | 0.014   | 607 | Yes |
| ENSG00000137135 | chr9  | 35675364  | 35677363  | ARHGEF39         | 84904  | Rho guanine nucleotide exchange factor (GEF) 39 [Source:HGNC Symbol; Acc:HGNC:25909] | protein coding       | 3  | 2  | 0.23  | 0.21  | 0.026  | 0.0084  | 612 | Yes |
| ENSG00000229257 | chr9  | 139950615 | 139952614 | RP11-229P13.22   |        |                                                                                      | antisense            | 1  | 1  | 0.77  | 0.71  | 0.064  | 0.014   | 614 | No  |
| ENSG00000226455 | chr6  | 90658335  | 90660334  | RP3-512E2.2      |        |                                                                                      | antisense            | 1  | 1  | 0.67  | 0.61  | 0.054  | 0.012   | 643 | No  |
| ENSG00000207935 | chr9  | 73424501  | 73426500  | MIR204           | 406987 | microRNA 204 [Source:HGNC Symbol; Acc:HGNC:31582]                                    | miRNA                | 2  | 1  | 0.69  | 0.75  | -0.059 | 0.019   | 671 | No  |
| ENSG00000259725 | chr16 | 54972084  | 54974083  | CTD-3032H12.1    |        |                                                                                      | lincRNA              | 11 | 10 | 0.67  | 0.61  | 0.052  | 0.016   | 692 | No  |
| ENSG00000199961 | chr17 | 74555691  | 74557690  | SNORD1B          | 677849 | small nucleolar RNA, C/D box 1B [Source:HGNC Symbol; Acc:HGNC:32676]                 | snoRNA               | 5  | 2  | 0.28  | 0.25  | 0.024  | 0.034   | 703 | No  |
| ENSG00000262810 | chr17 | 1991475   | 1993474   | RP11-667K14.5    |        |                                                                                      | antisense            | 1  | 1  | 0.8   | 0.74  | 0.061  | 0.023   | 735 | No  |
| ENSG00000269275 | chr19 | 55888994  | 55890993  | CTD-2105E13.15   |        |                                                                                      | antisense            | 5  | 2  | 0.74  | 0.69  | 0.054  | 0.018   | 743 | No  |
| ENSG00000233953 | chr2  | 60721321  | 60723320  | AC009970.1       |        |                                                                                      | antisense            | 2  | 2  | 0.65  | 0.7   | -0.049 | 0.00031 | 793 | No  |
| ENSG00000206077 | chr5  | 766568    | 768567    | ZDHHC11B         | 653082 | zinc finger, DHHC-type containing 11B [Source:HGNC Symbol; Acc:HGNC:32962]           | protein coding       | 5  | 1  | 0.68  | 0.63  | 0.048  | 0.03    | 841 | No  |
| ENSG00000233085 | chr6  | 169688812 | 169690811 | XXyac-YX65C7 A.3 |        |                                                                                      | lincRNA              | 3  | 1  | 0.35  | 0.33  | 0.022  | 0.041   | 845 | No  |

|                 |       |           |           |               |                 |                                                                                                                        |                      |                |   |       |       |        |         |        |      |
|-----------------|-------|-----------|-----------|---------------|-----------------|------------------------------------------------------------------------------------------------------------------------|----------------------|----------------|---|-------|-------|--------|---------|--------|------|
| ENSG00000073605 | chr17 | 38075608  | 38077607  | GSDMB         | 55876           | gasdermin B [Source:HGNC Symbol; Acc:HGNC:23690]                                                                       | protein coding       | 2              | 1 | 0.75  | 0.79  | -0.042 | 0.044   | 868    | No   |
| ENSG00000228680 | chr7  | 43288368  | 43290367  | AC004692.4    | 6506            | solute carrier family 1 (glial high affinity glutamate transporter), member 2 [Source:HGNC Symbol; Acc:HGNC:10940]     | antisense            | 5              | 4 | 0.64  | 0.6   | 0.041  | 0.0022  | 890    | Yes  |
| ENSG00000110436 | chr11 | 35441111  | 35443110  | SLC1A2        |                 |                                                                                                                        | protein coding       | 10             | 4 | 0.19  | 0.17  | 0.021  | 0.014   | 904    | No   |
| ENSG00000236874 | chr20 | 47013139  | 47015138  | RP1-66N13.1   | ENSG00000199609 | RNA, 5S ribosomal pseudogene 124 [Source:HGNC Symbol; Acc:HGNC:43024]                                                  | lincRNA              | 4              | 2 | 0.79  | 0.85  | -0.056 | 0.034   | 927    | No   |
| ENSG00000199609 | chr3  | 14434648  | 14436647  | RNA5SP124     |                 |                                                                                                                        | rRNA                 | 1              | 1 | 0.7   | 0.66  | 0.046  | 0.038   | 997    | No   |
| ENSG00000249184 | chr4  | 152719152 | 152721151 | RP11-424M21.1 | 440131          | long intergenic non-protein coding RNA 544 [Source:HGNC Symbol; Acc:HGNC:43679]                                        | lincRNA              | 1              | 1 | 0.79  | 0.84  | -0.054 | 0.019   | 1045   | No   |
| ENSG00000122043 | chr13 | 30508542  | 30510541  | LINC00544     |                 |                                                                                                                        | lincRNA              | 1              | 1 | 0.63  | 0.59  | 0.04   | 0.014   | 1074   | No   |
| ENSG00000203786 | chr1  | 152729006 | 152731005 | KPRP          | 448834          | keratinocyte proline-rich protein [Source:HGNC Symbol; Acc:HGNC:31823]                                                 | protein coding       | 6              | 2 | 0.33  | 0.36  | -0.026 | 0.027   | 1095   | No   |
| ENSG00000178685 | chr8  | 145086441 | 145088440 | PARP10        | 84875           | poly (ADP-ribose) polymerase family, member 10 [Source:HGNC Symbol; Acc:HGNC:25895]                                    | protein coding       | 3              | 1 | 0.31  | 0.29  | 0.02   | 0.049   | 1107   | No   |
| ENSG00000103257 | chr16 | 87902595  | 87904594  | SLC7A5        | 8140            | solute carrier family 7 (amino acid transporter light chain, L system), member 5 [Source:HGNC Symbol; Acc:HGNC:11063]  | protein coding       | 8              | 1 | 0.75  | 0.71  | 0.046  | 0.0053  | 1129   | No   |
| ENSG00000068079 | chr17 | 41157242  | 41159241  | IFI35         | 3430            | interferon-induced protein 35 [Source:HGNC Symbol; Acc:HGNC:5399]                                                      | protein coding       | 7              | 2 | 0.46  | 0.45  | 0.018  | 0.012   | 1191   | No   |
| ENSG00000114853 | chr3  | 42693676  | 42695675  | ZBTB47        | 92999           | zinc finger and BTB domain containing 47 [Source:HGNC Symbol; Acc:HGNC:26955]                                          | protein coding       | 6              | 3 | 0.2   | 0.21  | -0.018 | 0.033   | 1230   | No   |
| ENSG00000129226 | chr17 | 7481285   | 7483284   | CD68          | 968             | CD68 molecule [Source:HGNC Symbol; Acc:HGNC:1693]                                                                      | protein coding       | 5              | 1 | 0.046 | 0.064 | -0.018 | 0.038   | 1254   | No   |
| ENSG00000140398 | chr15 | 75637796  | 75639795  | NEIL1         | 79661<br>693216 | nei endonuclease VIII-like 1 (E. coli) [Source:HGNC Symbol; Acc:HGNC:18448]                                            | protein coding       | 5              | 2 | 0.38  | 0.4   | -0.017 | 0.049   | 1301   | No   |
| ENSG00000116819 | chr1  | 36037471  | 36039470  | TFAP2E        | 339488          | transcription factor AP-2 epsilon (activating enhancer binding protein 2 epsilon) [Source:HGNC Symbol; Acc:HGNC:30774] | protein coding       | 9              | 4 | 0.32  | 0.3   | 0.016  | 0.018   | 1436   | Yes  |
| ENSG00000265987 | chr17 | 73338986  | 73340985  | RP11-16C1.3   | ENSG00000111305 | germ cell associated 1 [Source:HGNC Symbol; Acc:HGNC:19716]                                                            | antisense            | 1              | 1 | 0.81  | 0.86  | -0.046 | 0.0084  | 1471   | No   |
| ENSG00000111305 | chr12 | 13256120  | 13258119  | GSG1          |                 |                                                                                                                        | 83445                | protein coding | 7 | 1     | 0.74  | 0.77   | -0.036  | 0.049  | 1562 |
| ENSG00000095970 | chr6  | 41130425  | 41132424  | TREM2         | 54209           | triggering receptor expressed on myeloid cells 2 [Source:HGNC Symbol; Acc:HGNC:17761]                                  | protein coding       | 6              | 2 | 0.76  | 0.73  | 0.026  | 0.029   | 1593   | No   |
| ENSG00000253673 | chr5  | 157600904 | 157602903 | CTC-436K13.1  | 100506700       | peptidoglycan recognition protein 3 [Source:HGNC Symbol; Acc:HGNC:30014]                                               | lincRNA              | 1              | 1 | 0.91  | 0.87  | 0.046  | 0.00023 | 1616   | No   |
| ENSG00000258675 | chr14 | 81916002  | 81918001  | RP11-299L17.3 |                 |                                                                                                                        | lincRNA              | 1              | 1 | 0.81  | 0.85  | -0.042 | 0.0059  | 1694   | No   |
| ENSG00000159527 | chr1  | 153282695 | 153284694 | PGLYRP3       |                 |                                                                                                                        | 114771               | protein coding | 6 | 2     | 0.84  | 0.89   | -0.042  | 0.0075 | 1695 |
| ENSG00000230080 | chr11 | 1824826   | 1826825   | AC139143.2    | ENSG00000252714 | RNA, 5S ribosomal pseudogene 392 [Source:HGNC Symbol; Acc:HGNC:43292]                                                  | processed pseudogene | 2              | 1 | 0.77  | 0.73  | 0.038  | 0.044   | 1711   | No   |
| ENSG00000252714 | chr15 | 40623350  | 40625349  | RNA5SP392     |                 |                                                                                                                        | rRNA                 | 2              | 1 | 0.79  | 0.82  | -0.034 | 0.04    | 1765   | No   |
| ENSG00000235700 | chr1  | 157096654 | 157098653 | CYCSP52       | 360155          | cytochrome c, somatic pseudogene 52 [Source:HGNC Symbol; Acc:HGNC:24393]                                               | processed pseudogene | 5              | 2 | 0.81  | 0.85  | -0.037 | 0.0023  | 1979   | No   |
| ENSG00000260272 | chr16 | 2544533   | 2546532   | RP11-20I23.1  | ENSG00000455547 | Uncharacterized protein [ECO:0000313 Ensembl:ENSP00000455547] [Source:UniProtKB/TrEMBL; Acc:H3BQ06]                    | protein coding       | 3              | 2 | 0.8   | 0.77  | 0.032  | 0.055   | 2020   | No   |

|                 |       |           |           |                  |           |                                                                                                     |                      |    |   |       |       |        |         |       |     |
|-----------------|-------|-----------|-----------|------------------|-----------|-----------------------------------------------------------------------------------------------------|----------------------|----|---|-------|-------|--------|---------|-------|-----|
| ENSG00000168237 | chr3  | 52319605  | 52321604  | GLYCTK           | 132158    | glycerate kinase [Source:HGNC Symbol; Acc:HGNC:24247]                                               | protein coding       | 2  | 1 | 0.042 | 0.054 | -0.012 | 0.00067 | 2280  | No  |
| ENSG00000233542 | chr1  | 1946470   | 1948469   | RP11-547D24.1    |           |                                                                                                     | antisense            | 1  | 1 | 0.6   | 0.57  | 0.025  | 0.055   | 2293  | No  |
| ENSG00000253024 | chr11 | 67162283  | 67164282  | RNU6-1238P       |           | RNA, U6 small nuclear 1238, pseudogene [Source:HGNC Symbol; Acc:HGNC:48201]                         | snRNA                | 4  | 2 | 0.7   | 0.73  | -0.028 | 0.037   | 2301  | No  |
| ENSG00000206612 | chr12 | 49050066  | 49052065  | SNORA2A          | 677793    | small nucleolar RNA, H/ACA box 2A [Source:HGNC Symbol; Acc:HGNC:32584]                              | snoRNA               | 4  | 1 | 0.86  | 0.89  | -0.033 | 0.046   | 2358  | No  |
| ENSG00000225208 | chr10 | 103069275 | 103071274 | RP11-107I14.2    |           |                                                                                                     | lincRNA              | 5  | 1 | 0.27  | 0.29  | -0.022 | 0.048   | 2498  | No  |
| ENSG00000231394 | chr7  | 55659970  | 55661969  | RP11-310H4.3     |           |                                                                                                     | lincRNA              | 1  | 1 | 0.77  | 0.74  | 0.031  | 0.0089  | 2538  | No  |
| ENSG00000133328 | chr11 | 63330356  | 63332355  | HRASLS2          | 54979     | HRAS-like suppressor 2 [Source:HGNC Symbol; Acc:HGNC:17824]                                         | protein coding       | 4  | 2 | 0.88  | 0.91  | -0.031 | 0.0036  | 2597  | No  |
| ENSG00000240288 | chr3  | 10325938  | 10327937  | GHRLOS           | 100126793 | ghrelin opposite strand/antisense RNA [Source:HGNC Symbol; Acc:HGNC:33885]                          | antisense            | 6  | 3 | 0.82  | 0.85  | -0.032 | 0.018   | 2652  | No  |
| ENSG00000207574 | chr8  | 145018948 | 145020947 | MIR661           | 724031    | microRNA 661 [Source:HGNC Symbol; Acc:HGNC:32917]                                                   | miRNA                | 16 | 9 | 0.65  | 0.68  | -0.026 | 0.032   | 2763  | No  |
| ENSG00000128285 | chr22 | 41073254  | 41075253  | MCHR1            | 2847      | melanin-concentrating hormone receptor 1 [Source:HGNC Symbol; Acc:HGNC:4479]                        | protein coding       | 5  | 1 | 0.8   | 0.82  | -0.028 | 0.041   | 2772  | No  |
| ENSG00000161653 | chr17 | 42080414  | 42082413  | NAGS             | 162417    | N-acetylglutamate synthase [Source:HGNC Symbol; Acc:HGNC:17996]                                     | protein coding       | 11 | 4 | 0.15  | 0.14  | 0.0099 | 0.029   | 3022  | No  |
| ENSG00000159958 | chr22 | 42322323  | 42324322  | TNFRSF13C        | 115650    | tumor necrosis factor receptor superfamily, member 13C [Source:HGNC Symbol; Acc:HGNC:17755]         | protein coding       | 5  | 2 | 0.55  | 0.53  | 0.016  | 0.0097  | 3650  | No  |
| ENSG00000262343 | chr17 | 77823410  | 77825409  | RP11-353N14.3    |           |                                                                                                     | lincRNA              | 1  | 1 | 0.87  | 0.9   | -0.028 | 0.018   | 3892  | No  |
| ENSG00000144824 | chr3  | 111449844 | 111451843 | PHLDB2           | 90102     | pleckstrin homology-like domain, family B, member 2 [Source:HGNC Symbol; Acc:HGNC:29573]            | protein coding       | 4  | 1 | 0.89  | 0.87  | 0.026  | 0.018   | 4044  | No  |
| ENSG00000251387 | chr5  | 139154492 | 139156491 | CTB-35F21.3      |           |                                                                                                     | lincRNA              | 2  | 1 | 0.062 | 0.055 | 0.007  | 0.03    | 4588  | Yes |
| ENSG00000271792 | chr5  | 139153390 | 139155389 | CTB-35F21.5      |           |                                                                                                     | lincRNA              | 2  | 1 | 0.062 | 0.055 | 0.007  | 0.03    | 4588  | Yes |
| ENSG00000263401 | chr5  | 173155581 | 173157580 | AC008674.1       |           |                                                                                                     | miRNA                | 1  | 1 | 0.75  | 0.77  | -0.022 | 0.054   | 4595  | No  |
| ENSG00000244355 | chr6  | 31681633  | 31683632  | LY6G6D           | 58530     | lymphocyte antigen 6 complex, locus G6D [Source:HGNC Symbol; Acc:HGNC:13935]                        | protein coding       | 8  | 5 | 0.47  | 0.5   | -0.03  | 0.0053  | 4801  | No  |
| ENSG00000259364 | chr15 | 40746339  | 40748338  | RP11-64K12.9     |           |                                                                                                     | antisense            | 1  | 1 | 0.89  | 0.92  | -0.025 | 0.049   | 5000  | No  |
| ENSG00000253616 | chr8  | 22931502  | 22933501  | RP11-875O11.3    |           |                                                                                                     | antisense            | 1  | 1 | 0.03  | 0.023 | 0.0061 | 0.052   | 5240  | No  |
| ENSG00000263013 | chr16 | 11033402  | 11035401  | RP11-876N24.5    |           |                                                                                                     | sense intronic       | 1  | 1 | 0.81  | 0.83  | -0.021 | 0.052   | 5446  | No  |
| ENSG00000262222 | chr16 | 11033076  | 11035075  | RP11-876N24.4    | 100505564 |                                                                                                     | antisense            | 1  | 1 | 0.81  | 0.83  | -0.021 | 0.052   | 5446  | No  |
| ENSG00000249661 | chr4  | 141566144 | 141568143 | TNRC18P1         |           | TNRC18P1 [Source:HGNC Symbol; Acc:HGNC:43881]                                                       | processed pseudogene | 1  | 1 | 0.93  | 0.9   | 0.022  | 0.0018  | 5990  | No  |
| ENSG00000172900 | chr11 | 71133970  | 71135969  | FLJ42102         | 399923    | uncharacterized LOC399923 [Source:EntrezGene; Acc:399923]                                           | unitary pseudogene   | 3  | 1 | 0.91  | 0.9   | 0.017  | 0.049   | 9013  | No  |
| ENSG00000238185 | chr13 | 31551261  | 31553260  | RP11-252M21.6    |           |                                                                                                     | antisense            | 1  | 1 | 0.94  | 0.93  | 0.017  | 0.018   | 9086  | No  |
| ENSG00000079393 | chr10 | 76868480  | 76870479  | DUSP13           | 51207     | dual specificity phosphatase 13 [Source:HGNC Symbol; Acc:HGNC:19681]                                | protein coding       | 5  | 1 | 0.87  | 0.89  | -0.016 | 0.032   | 9156  | No  |
| ENSG00000259881 | chr16 | 88945946  | 88947945  | RP11-830F9.5     |           |                                                                                                     | antisense            | 3  | 2 | 0.47  | 0.49  | -0.025 | 0.014   | 9216  | No  |
| ENSG00000204422 | chr6  | 31681350  | 31683349  | XXbac-BPG32J3.20 |           | Uncharacterized protein {ECO:0000313 Ensembl:ENSP00000475702} [Source:UniProtKB/TrEMBL; Acc:U3KQA8] | protein coding       | 8  | 4 | 0.44  | 0.47  | -0.022 | 0.033   | 9221  | No  |
| ENSG00000255552 | chr6  | 31681343  | 31683342  | LY6G6E           |           | lymphocyte antigen 6 complex, locus G6E (pseudogene) [Source:HGNC Symbol; Acc:HGNC:13934]           | protein coding       | 8  | 4 | 0.44  | 0.47  | -0.022 | 0.033   | 9221  | No  |
| ENSG00000260077 | chr2  | 10180291  | 10182290  | RP11-254F7.2     |           |                                                                                                     | lincRNA              | 1  | 1 | 0.94  | 0.92  | 0.016  | 0.0031  | 9771  | No  |
| ENSG00000272476 | chr6  | 108277117 | 108279116 | RP1-191J18.66    |           |                                                                                                     | antisense            | 1  | 1 | 0.018 | 0.015 | 0.0027 | 0.042   | 10114 | No  |
| ENSG00000207499 | chr6  | 106867081 | 106869080 | Y RNA            |           | Y RNA [Source:RFAM; Acc:RF00019]                                                                    | misc RNA             | 1  | 1 | 0.91  | 0.92  | -0.015 | 0.054   | 10388 | No  |

|                 |      |           |           |         |       |                                                                         |                |   |   |      |      |        |        |       |    |
|-----------------|------|-----------|-----------|---------|-------|-------------------------------------------------------------------------|----------------|---|---|------|------|--------|--------|-------|----|
| ENSG00000161010 | chr5 | 179288674 | 179290673 | C5orf45 | 51149 | chromosome 5 open reading frame 45 [Source:HGNC Symbol; Acc:HGNC:30817] | protein coding | 2 | 1 | 0.95 | 0.93 | 0.015  | 0.034  | 10430 | No |
| ENSG00000199866 | chr2 | 173422481 | 173424480 | Y RNA   |       | Y RNA [Source:RFAM; Acc:RF00019]                                        | misc RNA       | 1 | 1 | 0.95 | 0.96 | -0.011 | 0.0059 | 14277 | No |
| ENSG00000115009 | chr2 | 228677058 | 228679057 | CCL20   | 6364  | chemokine (C-C motif) ligand 20 [Source:HGNC Symbol; Acc:HGNC:10619]    | protein coding | 3 | 1 | 0.97 | 0.96 | 0.0064 | 0.046  | 18179 | No |

---
