# Supplementary material for: Epigenomic profiling of preterm infants reveals DNA methylation differences at sites associated with neural function
Source: PubMed Central journal article supplement (PMC5068883; doi:10.1038/tp.2015.210), 2016-01-19
Supplement: tp2015210x3.pdf [file tp2015210x3.pdf]

Variance in DNAm of preterm infants explained by the first 23 principal components.

| <b>Principal component</b> | <b>Total variance / %</b> | <b>Cumulative variance / %</b> |
|----------------------------|---------------------------|--------------------------------|
| <b>1</b>                   | 31.8                      | 31.8                           |
| <b>2</b>                   | 20.1                      | 51.9                           |
| <b>3</b>                   | 4.5                       | 56.4                           |
| <b>4</b>                   | 3.8                       | 60.2                           |
| <b>5</b>                   | 3.3                       | 63.5                           |
| <b>6</b>                   | 2.9                       | 66.4                           |
| <b>7</b>                   | 2.6                       | 69.0                           |
| <b>8</b>                   | 2.3                       | 71.3                           |
| <b>9</b>                   | 2.2                       | 73.5                           |
| <b>10</b>                  | 2.2                       | 75.7                           |
| <b>11</b>                  | 2.0                       | 77.7                           |
| <b>12</b>                  | 1.9                       | 79.6                           |
| <b>13</b>                  | 1.8                       | 81.4                           |
| <b>14</b>                  | 1.7                       | 83.1                           |
| <b>15</b>                  | 1.6                       | 84.7                           |
| <b>16</b>                  | 1.6                       | 86.3                           |
| <b>17</b>                  | 1.6                       | 87.9                           |
| <b>18</b>                  | 1.5                       | 89.4                           |
| <b>19</b>                  | 1.3                       | 90.7                           |
| <b>20</b>                  | 1.3                       | 92.0                           |
| <b>21</b>                  | 1.2                       | 93.2                           |
| <b>22</b>                  | 1.1                       | 94.3                           |
| <b>23</b>                  | 1.0                       | 95.3                           |

Values rounded to 1dp.
